# Supplementary material for: IL-6 Mutation Attenuates Liver Injury Caused by Aeromonas hydrophila Infection by Reducing Oxidative Stress in Zebrafish
Source: MDPI journal article supplement (doi:10.3390/ijms242417215), 2023-12-07
Supplement: s1 [file s1]

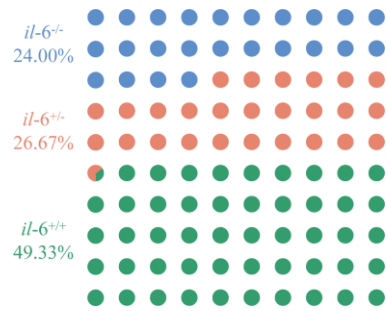

**Figure. S1** Statistics of the number of different genotypes zebrafish. The count of adult fish belonging to the categories of homozygous (*il-6<sup>-/-</sup>*), heterozygous (*il-6<sup>+/-</sup>*), and wild type (*il-6<sup>+/+</sup>*) in F2.

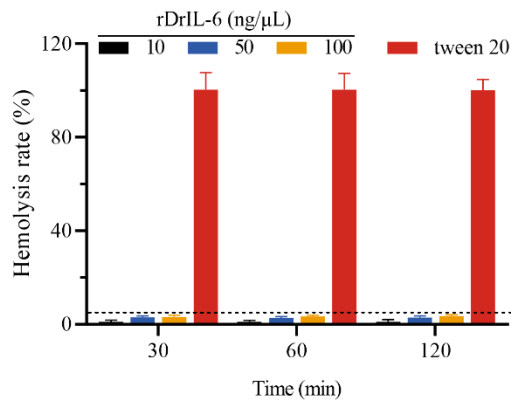

**Figure. S2** Hemolysis study of rDrIL-6. Hemolytic activity of each group was detected with 2% erythrocytes for 2 h at 37 °C. Tween 20 was used as a positive control.

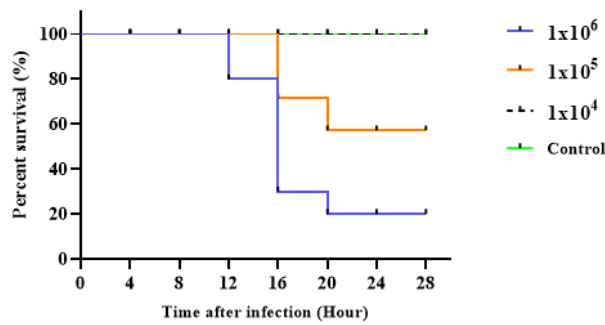

**Figure. S3** Survival curves. Different concentrations of *A. hydrophila* were injected into WT zebrafish. PBS was used as negative control group.

**Table S1** Sequencing data statistics

| Samples  | Clean reads | Clean bases | Q20 (%) | Q30 (%) | GC (%) |
|----------|-------------|-------------|---------|---------|--------|
| WT-AH-1  | 24087734    | 7197071884  | 97.76   | 93.50   | 46.48  |
| WT-AH-2  | 22431348    | 6709101456  | 98.42   | 94.98   | 46.78  |
| WT-AH-3  | 26984273    | 8065064692  | 97.49   | 92.85   | 47.16  |
| KO-AH-1  | 23529819    | 7039470312  | 97.47   | 92.76   | 46.98  |
| KO-AH-2  | 21851054    | 6498401222  | 97.79   | 93.71   | 45.15  |
| KO-AH -3 | 23785409    | 7113612090  | 97.33   | 92.47   | 48.01  |

WT-AH: WT zebrafish were treated with *A. hydrophila*; KO-AH: *il-6<sup>-/-</sup>* zebrafish were treated with *A. hydrophila*.

**Table S2** Significantly enriched KEGG pathway

| Pathway                                      | Gene Ratio | q value   | Gene number |
|----------------------------------------------|------------|-----------|-------------|
| Ribosome                                     | 3.85%      | 5.66E-14  | 66          |
| Steroid biosynthesis                         | 1.11%      | 3.99E-09  | 19          |
| Carbon metabolism                            | 3.73%      | 2.51E-08  | 64          |
| PPAR signaling pathway                       | 2.57%      | 2.71E-07  | 44          |
| Pentose and glucuronate interconversions     | 1.57%      | 7.79E-05  | 27          |
| Porphyrin and chlorophyll metabolism         | 1.63%      | 7.79E-05  | 28          |
| Terpenoid backbone biosynthesis              | 0.93%      | 7.79E-05  | 16          |
| Steroid hormone biosynthesis                 | 1.87%      | 9.25E-05  | 32          |
| Glyoxylate and dicarboxylate metabolism      | 1.22%      | 9.25E-05  | 21          |
| One carbon pool by folate                    | 0.76%      | 0.0002298 | 13          |
| Amino sugar and nucleotide sugar metabolism  | 1.75%      | 0.0002413 | 30          |
| Glycine, serine and threonine metabolism     | 1.22%      | 0.0002413 | 21          |
| Proteasome                                   | 1.34%      | 0.0002924 | 23          |
| Ascorbate and aldarate metabolism            | 1.28%      | 0.0003162 | 22          |
| Metabolism of xenobiotics by cytochrome P450 | 1.69%      | 0.0003419 | 29          |
| Biosynthesis of amino acids                  | 2.10%      | 0.0003419 | 36          |
| Pyruvate metabolism                          | 1.40%      | 0.0006344 | 24          |
| Protein processing in endoplasmic reticulum  | 4.02%      | 0.0006930 | 69          |
| Drug metabolism - cytochrome P450            | 1.63%      | 0.0007329 | 28          |
| Drug metabolism - other enzymes              | 2.04%      | 0.0019157 | 35          |
| Arginine and proline metabolism              | 1.57%      | 0.0020473 | 27          |
| Fatty acid biosynthesis                      | 0.76%      | 0.0067974 | 13          |
| p53 signaling pathway                        | 2.04%      | 0.0072303 | 35          |
| Prion disease                                | 0.41%      | 0.0078607 | 7           |
| Retinol metabolism                           | 1.69%      | 0.0083972 | 29          |
| Pentose phosphate pathway                    | 0.99%      | 0.0136290 | 17          |
| Glycosylphosphatidylinositol (GPI)-anchor    | 0.58%      | 0.0150207 | 10          |

|                                            |       |           |    |
|--------------------------------------------|-------|-----------|----|
| biosynthesis                               |       |           |    |
| Complement and coagulation cascades        | 0.47% | 0.0174599 | 8  |
| Pantothenate and CoA biosynthesis          | 0.58% | 0.0188271 | 10 |
| Cysteine and methionine metabolism         | 1.22% | 0.0190987 | 21 |
| Fatty acid metabolism                      | 1.52% | 0.0190987 | 26 |
| Systemic lupus erythematosus               | 0.41% | 0.0232069 | 7  |
| Starch and sucrose metabolism              | 0.93% | 0.0232331 | 16 |
| ABC transporters                           | 1.17% | 0.0245442 | 20 |
| Propanoate metabolism                      | 0.87% | 0.0272690 | 15 |
| Phagosome                                  | 4.02% | 0.0287981 | 69 |
| Fatty acid degradation                     | 1.05% | 0.0301899 | 18 |
| Vitamin digestion and absorption           | 0.23% | 0.0352759 | 4  |
| Cholesterol metabolism                     | 0.23% | 0.0352759 | 4  |
| Protein export                             | 0.52% | 0.0365142 | 9  |
| Synthesis and degradation of ketone bodies | 0.41% | 0.0368678 | 7  |
| Hepatitis C                                | 0.47% | 0.0416431 | 8  |
| Adipocytokine signaling pathway            | 1.69% | 0.0440273 | 29 |

Analysis of *il-6<sup>-/-</sup>* and WT zebrafish liver transcriptome KEGG enrichment following *A. hydrophila* infection.  
q value  $\leq 0.05$  indicated significantly enriched KEGG pathway.

**Table S3** Primers used in this study

| Primer<br>name | Sequence (5'-3')                       | Application |
|----------------|----------------------------------------|-------------|
| IL-6-sg-F      | GTAATACGACTCACTATAGGCAGCGGTCTGAAGGTTTG | Amplified   |
|                | GTTTTAGAGCTAGAAATAGC                   | sgRNA       |
| IL-6-sg-R      | AAAAGCACCGACTCGGTGCC                   | template    |
| apoeb-F        | CAGATGACCCCATACGCCTC                   | qPCR        |
| apoeb-R        | GGCGTTTCTTCAGTTTGCGT                   |             |
| dazap2-F       | TCTAGTGTCCTCGATGGCGTA                  | qPCR        |
| dazap2-R       | CAGATGGTGTAACCACCGCT                   |             |
| aldh1l1-F      | GGTCCCCAAAACCACAAAGC                   | qPCR        |
| aldh1l1-R      | GCCCCAAAAGACTCCTCGACA                  |             |
| abcc2-F        | GGTTACCTGTATGCGGTGCT                   | qPCR        |
| abcc2-R        | CCGGGAGTCATTGGACACAA                   |             |
| ctnnb2-F       | GCTCCACTCACTGAACTGCT                   | qPCR        |
| ctnnb2-R       | CGTCTGCTCTGTATGCGAGT                   |             |
| acly-F         | GCGGGAACACCCTACAAGAA                   | qPCR        |
| acly-R         | ATCCTGGACCAGTCTCTCCC                   |             |
| cyp51-F        | GATGGCCAAAACCCCTCAGA                   | qPCR        |
| cyp51-R        | CCGAATGGGATGTAGGCGAA                   |             |

|            |                                  |              |
|------------|----------------------------------|--------------|
| dpm3-F     | GCTGGCATTGAATAGTAGGTGG           | qPCR         |
| dpm3-R     | TCGGCCATGCAAGCTCTTTA             |              |
| lrpap1-F   | CTCACTGATTGGCTGGGGTT             | qPCR         |
| lrpap1-R   | CCCACATGTTTGTGGGAAGC             |              |
| tmco1-F    | AATGCTGACGCTGCTACAGT             | qPCR         |
| tmco1-R    | CGGTACACCAGAACCCATGT             |              |
| 18s-F      | CACTGCACAGAGGTCTCGTT             | qPCR         |
| 18s-R      | TTGGTGT CAGCCCTTACGTC            |              |
| IL-6-32a-F | CCGGAATTCATGCCATCCGCTCAGAAAACA   | plasmid      |
| IL-6-32a-R | CCGCTCGAGTTAGTTCTTGT CAGCGCTGCCC | construction |

---
